1 **Original Research**

2 **Tumor Immunity Microenvironment-based classifications**  
3 **of bladder cancer for enhancing cancer immunotherapy**

4

5 Jialin Meng<sup>1#</sup>, Xiaofan Lu<sup>2#</sup>, Yujie Zhou<sup>3#</sup>, Meng Zhang<sup>1,4</sup>, Jun Zhou<sup>1</sup>, Zongyao Hao<sup>1</sup>,  
6 Yinan Du<sup>5</sup>, Fangrong Yan<sup>2\*</sup>, Chaozhao Liang<sup>1\*</sup>

7

8 1. Department of Urology, The First Affiliated Hospital of Anhui Medical University;  
9 Institute of Urology & Anhui Province Key Laboratory of Genitourinary Diseases, Anhui  
10 Medical University, Hefei, 230022, P.R. China.

11 2. State Key Laboratory of Natural Medicines, Research Center of Biostatistics and  
12 Computational Pharmacy, China Pharmaceutical University, Nanjing 211198, P.R.  
13 China.

14 3. Division of Gastroenterology and Hepatology, Key Laboratory of Gastroenterology and  
15 Hepatology, Ministry of Health, Renji Hospital, School of Medicine, Shanghai Jiao Tong  
16 University, Shanghai Institute of Digestive Disease, Shanghai, 200127, P.R. China.

17 4. Urology Institute of Shenzhen University, The Third Affiliated Hospital of Shenzhen  
18 University, Shenzhen University, Shenzhen, 518000, P.R. China.

19 5. School of Basic Medical Sciences, Anhui Medical University, Hefei, Anhui 230032, P.R.  
20 China.

21

22 # These authors contributed equally to the study.

23

24 **\*Correspondence:**

25 Prof. Fangrong Yan

26 State Key Laboratory of Natural Medicines, Research Center of Biostatistics and

27 Computational Pharmacy, China Pharmaceutical University

28 Nanjing 211198, P.R. China.

29 [f.r.yan@163.com](mailto:f.r.yan@163.com)

30

31 Prof. Chaozhao Liang

32 Department of Urology, The First Affiliated Hospital of Anhui Medical University; Institute

33 of Urology & Anhui Province Key Laboratory of Genitourinary Diseases, Anhui Medical

34 University

35 218<sup>th</sup> Jixi Road, Hefei, 230022, P.R. China

36 [liang\\_chaozhao@ahmu.edu.cn](mailto:liang_chaozhao@ahmu.edu.cn)

37 **Running title:** Immune classifications of bladder cancer for immunotherapy

38

39

40

41

42

43

44

45 **ABSTRACT**

46 **Background:** Bladder cancer is composed by a mass of heterogenetic characteristics,  
47 immunotherapy is a potential way to save the life of bladder cancer patients, but only  
48 benefit to about 20% patients.

49 **Methods and materials:** A total of 4003 bladder cancer patients from 19 cohorts was  
50 enrolled in this study, collecting the clinical information and mRNA expression profile. The  
51 unsupervised non-negative matrix factorization (NMF) and nearest template prediction  
52 (NTP) algorithm was used to divide the patients to immune activated, immune exhausted  
53 and non-immune class. Verified gene sets of signatures were used to illustrate the  
54 characteristic of immunophenotypes. Clinical and genetic features were compared in  
55 different immunophenotypes.

56 **Results:** We identified the immune class and non-immune classes in from TCGA-BLCA  
57 cohort. The 150 top different expression genes between these two classes was extracted  
58 as the input profile for the reappearing of the classification in the other 19 cohorts. As to  
59 the activated and exhausted subgroups, a stromal activation signature was conducted by  
60 NTP algorithm. Patients in the immune classes shown the highly enriched signatures of  
61 immunocytes, while the exhausted subgroup also shown an increased signature of TITR,  
62 WNT/TGF- $\beta$ , TGF- $\beta$ 1 activated, and C-ECM signatures. Patients in the immune activated  
63 shown a lower CNA burden, better overall survival, and favorable response to anti-PD-1  
64 therapy.

65 **Conclusion:** We defined and validated a novel classifier among the 4003 bladder cancer  
66 patients. Anti-PD-1 immunotherapy could benefit more for the patients belong to immune  
67 activated subgroup, while ICB therapy plus TGF- $\beta$  inhibitor or EP300 inhibitor might be  
68 more effectiveness for patients in immune exhausted subgroup.

69 **Keywords:** bladder cancer, non-negative matrix factorization, immunotherapy, immune  
70 checkpoints blockade

## 71 **INTRODUCTION**

72 Bladder cancer is the 10<sup>th</sup> most frequent tumor globally, of which with a high rate of  
73 recurrence<sup>1</sup>. There are about 550 thousand new cases and 200 thousand specific deaths  
74 caused by bladder cancer each year. The incidence rate of bladder cancer variable around  
75 the world, with the highest rate in Southern Europe, and lowest rate at Middle Africa<sup>2</sup>. In  
76 United States, bladder cancer ranges the 6<sup>th</sup> common tumor, with about 81 thousand new  
77 cases and 18 thousand new deaths at 2020<sup>3</sup>. Most patients diagnosed at the early stage  
78 of bladder cancer, also known as the non-muscle-invasive bladder cancer (NMIBC),  
79 which only processes away from the muscle layer and could be removed easily through  
80 the transurethral resection (TUR), or plus with the intravesical therapy with Bacillus  
81 Calmette-Guérin (BCG) or other chemotherapeutic medicine<sup>4-6</sup>. Recurrence is extremely  
82 common in NMIBC, about 70% patients will suffer from the health burden of bladder  
83 cancer again within 10 years, and one thirds of them step into advanced stage, also called  
84 muscle-invasive bladder cancer (MIBC)<sup>7</sup>. The standard care of MIBC is radical cystectomy  
85 with or without neoadjuvant chemotherapy or chemoradiation. And even after the  
86 treatment, almost 50% MIBC patients will recurrent and death from the metastatic stage  
87 within 3 years<sup>8</sup>.

88 In the tumor mass, the normal cells, blood vessels, and cytokines which surround and  
89 support the alive of tumor cells are composes of the tumor microenvironmnt (TIME). The  
90 cross talk existed between the tumor and the TIME, the tumor cells could alter the TIME,  
91 and the TIME could also promote the growth and spread of the tumors<sup>9</sup>. Several studies  
92 investigated the diagnosis markers, prognostic signatures or therapeutic targets for

93 malignancy tumors based on the TIME, as well as in bladder cancer. BCG is the earliest  
94 immune therapy approved in bladder cancer treatment, which could stimulate an  
95 immunologic reaction inducing a proinflammatory cytokine and direct cell-to-cell  
96 cytotoxicity<sup>10</sup>. BCG is still the standard therapy for NMIBC, which reflect that bladder  
97 cancer patients could benefit from immunotherapy. The development of the blockade of  
98 immune checkpoints also applied in the treatment of bladder cancer. Two PD-1 inhibitors  
99 (pembrolizumab and nivolumab) and three PD-L1 inhibitors (atezolizumab, durvalumab,  
100 and avelumab) were approved by the FDA for the treatment of bladder cancer  
101 (<https://www.accessdata.fda.gov/scripts/cder/daf>). In the IMvigor210 clinical study,  
102 atezolizumab was used to block the PD-L1, the objective response rate (ORR) for  
103 IMvigor210 cohort 1 is only 23%, 15% in the cohort 2<sup>11,12</sup>. The ORR for Nivolumab and  
104 durvalumab is similar, from 17% to 24.4%<sup>13-16</sup>. Therefore, a full understanding of the  
105 immunophenotypes to bladder cancer is essential, which could as the guidance to choose  
106 the patients to receive the appropriate immunotherapy.

107 We enrolled 4003 bladder cancer patients from 20 independent cohorts. Non-negative  
108 matrix factorization (NMF) algorithm and nearest template prediction (NTP) was applied  
109 to distinguish the immunophenotypes of bladder cancer patients in training cohort of  
110 TCGA-BLCA, as well as validated in the other 19 cohorts. The novel definition of  
111 immunophenotypes could provide illuminations for the immunotherapy of bladder cancer  
112 patients.

113

## 114 **MATERIALS AND METHODS**

### 115 **Bladder cancer patient cohorts**

116 4003 bladder cancer patients were registered in the current study, with the gene  
117 expression profiles, clinicopathological information and overall survival data (**Figure 1**).  
118 For TCGA-BLCA cohort, we obtained the level 3 gene expression profile of 408 patients  
119 from TCGA Data Portal (<https://tcga-data.nci.nih.gov/tcga>), only genes expressed in at  
120 least 50% of the samples were retained for analyses. For the further external validation  
121 cohorts, GSE32894, GSE83586, GSE87304, GSE128702, GSE13507, GSE129871,  
122 GSE120736, GSE39016, GSE128701, GSE124035, GSE86411, GSE48276, GSE31684,  
123 GSE134292, GSE69795, the gene expression profile were collected from Gene  
124 Expression Omnibus (<http://www.ncbi.nlm.nih.gov/geo/>). For E-MTAB-4321 and E-MTAB-  
125 1803 cohorts, the gene expression profile were downloaded from ArrayExpress  
126 (<https://www.ebi.ac.uk/arrayexpress/>). For IMvigor210 cohort, the gene expression profile  
127 was obtained from IMvigor210CoreBiologies, a data package for the R statistical  
128 computing environment. Detailed information of these datasets was displayed in **Table S1**.

## 129 **Bioinformatic analyses**

130 The mRNA expression profile of 408 bladder cancer patients from TCGA-BLCA cohort  
131 were microdissected by the unsupervised non-negative matrix factorization (NMF)  
132 algorithm<sup>17</sup>. Immune module was selected with the gathering of patients with the high  
133 immune enrichment score calculated by the the single-sample gene set enrichment  
134 analysis (ssGSEA) as described previously<sup>18</sup>. Top 150 exemplar genes with the highest  
135 weight in the immune module was extracted as the key genes to dichotomize the immune  
136 and non-immune classes, which further modified by the multidimensional scaling random  
137 forest method<sup>19</sup>. Immune activated and exhausted subgroups were recognized by the  
138 stromal activation signature with nearest template prediction<sup>20</sup>. To depict the  
139 characteristics of these three immunophenotypes, several immune associated signatures  
140 were manually collected and the score of each signature for each patient were generated

141 via ssGSEA (**Table S2**). The different genetic types among immune and non-immune  
142 classes were evaluated, including tumor-infiltrating lymphocytes (TILs) abundance,  
143 Programmed death-ligand 1 (PD-L1) expression, Copy number alterations (CNA), tumor  
144 mutation burden (TMB), neoantigens and mutant genes. To reappearing the  
145 immunophenotypes we generated, the expression profile of the top 150 differentially  
146 expressed genes (DEGs), which increased in immune class than non-immune class, were  
147 used to dichotomize the immune classes in validation cohorts with the NMFConsensus  
148 method, immune class divided into activated and exhausted subgroups subsequently.  
149 Details about the enrolled cohorts, as well as the specific method of each step were  
150 provided in the **Supplementary Materials and Methods**.

151

## 152 **RESULTS**

### 153 **Identify the immune module and derivate immune class of bladder cancer**

154 We performed the virtual microdissection with the NMF algorithm, the mRNA expression  
155 profile of 408 bladder cancer patients from TCGA-BLCA cohort was analyzed as the  
156 training cohort. To obtain the robust immune module, we pre-set the numbers of module  
157 as five to 10, respectively, finally, when the total modules is nine, the first module strongly  
158 enriched the patients with a highly immune enrichment score (IES), of which defined as  
159 the immune module (**Figure 2A**). The top 150 weighted genes in the immune module were  
160 defined as the exemplar genes which could inflect the characteristics of the immune  
161 module (**Table S3**). These genes were involved in the signaling pathways of T cell  
162 activation, antigen processing and presentation, B cell activation based on the analysis  
163 among ontology biological process, and associated with the activation of the pathways  
164 related with Th1/Th2 cell differentiation, T cell receptor signaling pathway, B cell receptor

165 signaling pathway, and PD-L1 expression/PD-1 checkpoint pathway (all,  $P < 0.05$ , **Table**  
166 **S4**). Subsequently, we re-defined the total 408 bladder patients to immune enriched or  
167 non-immune enriched groups by the consensus clustering based on the 150 exemplar  
168 genes (**Figure 2B**), what's more, the multidimensional scaling (MDS) random forest was  
169 further employed to define a more precise classify of immune and non-immune classes  
170 (**Figure 2C**). In **Figure 2D**, the distribution and association of the 408 bladder cancer  
171 patients among NMF modules, immune module weight, exemplar gene clustering, final  
172 immune classes and immune enrichment score was shown.

173 Several immune associated signatures (**Table S2**) were collected to help us to confirm the  
174 classification of immune or non-immune classes, the enrichment score of each signature  
175 among each patient were conducted by ssGSEA. We observed the increased enrichment  
176 of T cells (reflected by the signatures of 13 T-cell signature, T cells, CD8+ T cells, T. NK.  
177 Metagene), B cells (reflected by the signatures of B-cell cluster, B.P. meta), macrophages,  
178 tertiary lymphoid structure (TLS), cytolytic activity score (CYT) and IFN signatures (all,  $P$   
179  $< 0.05$ , **Figure 3**). We also analyzed the activated KEGG signaling pathways by GSEA,  
180 we revealed that the immune cell pathways (including T cell, B cell, natural killer cell and  
181 leukocyte associated pathways), immune response pathways (including chemokine  
182 signaling pathways, antigen processing presentation, cell adhesion molecules cams and  
183 complement coagulation cascades), proinflammatory pathways (including FC-Epsilon-RI,  
184 NOD like receptor and FC gamma R mediated phagocytosis pathways) were all active in  
185 the immune class (**Figure S1**). Taken together the results from **Figure 2**, **Figure 3 up**  
186 **panel**, **Figure S1**, and **Table S3-S4**, we microdissected the immune and non-immune  
187 classes in TCGA-BLCA cohort, activated immune associated signatures and signaling  
188 pathways were observed in the immune class.

189



190 **Tumor immune microenvironment to immunophenotypes distinguished by**  
191 **activation of stromal cells**

192 Fibroblasts, mesenchymal stromal cells (MSCs), and extracellular matrix (ECM) are the  
193 key components to compose the tumor stroma, support and connective the tumor cells<sup>21</sup>.  
194 Especially at the late stage of tumors, the genetic and epigenetic alterations of the tumor  
195 cells were driven by the activated stroma components<sup>22</sup>. MSCs act as the inherently  
196 regulators of tumor, which could secreta the inhibiting soluble factors and alter the cell  
197 surface markers to suppress the immune microenvironment, the inhibition of T-cell  
198 proliferation and induction of T regulatory cells (Tregs) were all affected by the regulation  
199 of PD-L1 by MSCs<sup>23,24</sup>. MSCs could handle the function of suppress immune process  
200 through decreasing the expression of pro-inflammatory factors, including IFN- $\gamma$ , TNF- $\alpha$   
201 and IL-1 $\beta$ , or promoting the expression of type 2 factors, IL-10 and IL13<sup>25,26 27</sup>. For this  
202 reason, the previously defined stromal activated signature was employed to further divide  
203 the immune class to immune activated and exhausted immunophenotypes, which could  
204 reflect the immune response status. A total of 11.0% (45/408) bladder cancer patients in  
205 TCGA-BLCA cohort was defined with the activated immunophenotype and inactivated  
206 stromal phenotype, belong to immune activated subgroup, while the other 27.0% (110/408)  
207 patients belong to immune exhausted subgroup, with the activated stromal phenotype  
208 (**Figure 3**). The ECM cytokines (C-ECM) secreted by the fibroblasts could recruit the  
209 immunosuppressive cells, the TGF- $\beta$  is an accepted immunosuppressor in the immune  
210 microenvironment, as well as the Treg cells and MDSC cells could reflect the immune  
211 exhausted status in TME<sup>28-31</sup>. These signatures were evaluated by ssGSEA analysis, and  
212 we revealed that the TITR, WNT/TGF- $\beta$ , TGF- $\beta$ 1 activated, and C-ECM signatures were  
213 higher in the immune exhausted subgroup than activated subgroup (all,  $P < 0.05$ , **Figure**  
214 **3, Figure S2**). TIM-3 and LAG3 are reported associated with the immune exhausted

215 status<sup>32,33</sup>, we also generated the similar results in the immune activated and immune  
216 exhausted subgroups, increased TIM-3 ( $P = 0.008$ ) and LAG3 ( $P = 0.218$ ) were observed  
217 in the immune exhausted subgroup (**Figure S2**). Based on the results from **Figure 3 down**  
218 **panel** and **Figure S2**, we separated the immune class into immune activated and immune  
219 exhausted subgroups, stromal enrichment score, TITR, MDSC and WNT/TGF- $\beta$   
220 signatures increased in the immune exhausted subgroup, and also validated by the  
221 immune exhausted markers, TIM-3 and LAG3.

## 222 **The heterogeneity of genetic phenotypes among immune and non-immune classes**

223 To confirm the infiltration of immunocytes among the immune and non-immune classes  
224 distinguished by the mRNA expression profile of the exemplar genes, we compared the  
225 tumor-infiltrating lymphocytes (TIL) abundance of the 408 bladder cancer patients, which  
226 was anteriorly estimated by the Hematoxylin-eosin staining (H&E) stained whole-slide  
227 images of TCGA samples<sup>34</sup>. We obtained the result that the TIL abundance is higher in  
228 the immune class than non-immune class ( $P < 0.001$ , **Figure 4A**), consistent with the  
229 definition of these two groups. What's more, we also observed the high expressed PD-L1  
230 level in the immune class than non-immune class ( $P < 0.001$ , **Figure 4B**). The gene copy  
231 number alteration (CNA), tumor mutant burden (TMB), and neoantigens was reported  
232 have the crosstalk with tumor immune activation. Patients in the non-immune class shown  
233 an increased level of deletion in both arm and focal level ( $P_{\text{Arm-del}} < 0.001$ ,  $P_{\text{Focal-del}} = 0.007$ ),  
234 but not the CNA amplification ( $P_{\text{Arm-Amp}} = 0.733$ , and  $P_{\text{Focal-Amp}} = 0.065$ ) (**Figure 4C**), which  
235 reflected the positive association of immune infiltration and gene CNA deletion. With the  
236 online tool of TIMER, we double confirmed the association between immune infiltration  
237 and gene CNA deletion, the deep deletion and arm-level deletion of PD-1, PD-L1 and  
238 CTLA4, the three major immune checkpoints, linked with the decreased immunocytes  
239 infiltration, especially for CD4+ T cell, Neutrophil, and dendritic cell (**Figure S3**).

240 The TMB in immune class is higher than that in non-immune class ( $P = 0.01$ , **Figure 4D**),  
241 while the neoantigens level shown no difference ( $P = 0.109$ , **Figure 4E**). We further  
242 compared the specific gene mutations in the immune subgroups (**Figure 4F**). The  
243 mutation of TP53 (53.5% vs. 43.1%,  $P = 0.051$ ), TTN (52.9% vs. 39.5%,  $P = 0.011$ ),  
244 PIK3CA (28.0% vs. 17.0%,  $P = 0.007$ ) and RB1 (26.0% vs. 13.0%,  $P < 0.001$ ) appeared  
245 more in the immune class than non-immune class (**Figure 5A**). While ERBB2 ( $P = 0.035$ ),  
246 KMT2A ( $P = 0.013$ ), PKHD1 ( $P = 0.007$ ) and MDN1 ( $P = 0.015$ ) similar to be the specific  
247 mutations of immune activated subgroup(**Figure 5B**), and EP300 ( $P = 0.020$ ), HMCN1 ( $P$   
248 = 0.014), AKAP9 ( $P = 0.003$ ) and MACF1 ( $P = 0.016$ ) mutant patients enriched more in  
249 immune exhausted subgroups(**Figure 5C**). Taken together the results from **Figure 4**,  
250 **Figure 5**, and **Figure S3**, our results reveal that the immune class is correlated with  
251 significantly lower copy number deletion, higher TILs abundance, higher TMB, higher PD-  
252 L1, but not neoantigens. The specific mutant genes in the immunophenotypes are diverse.

### 253 **Reappearing the three immunophenotypes in 19 external cohorts**

254 19 external cohorts with the mRNA expression profile were collected to reappear the three  
255 immunophenotypes defined by the NMF algorithm microdissected and activated stroma  
256 signature ( **Figure 1, Table S1**). The increased top 150 different expression genes (DEGs)  
257 between the immune and non-immune classes (**Table S5**) was chosen as the seed genes  
258 to reappear the immune subclasses in the external cohorts with the GenePattern module  
259 “NMFConsensus”, and then, the immune class divided to activated and exhausted  
260 subgroups by the and nearest template prediction (NTP) module.

261 In GSE32894 cohort, 60.7% (187/308) patients identified as the non-immune class, with  
262 the lower enrichment of immune associated signatures, as for the remaining 121 patients,  
263 compared with the signatures of stromal enrichment, 42 patients belong to the immune

264 activated subgroup, and 79 belong to the immune exhausted subgroup. Patients in the  
265 immune exhausted subgroup shown a high enrichment score of TITR, MDSC, WNT/TGF $\beta$ ,  
266 TGF $\beta$ -1 activated and C-ECM signatures (all,  $P < 0.01$ , **Figure 6**).

267 In the other 3287 bladder cancer patients from 18 cohorts, we also reappeared the three  
268 immunophenotypes, the results displayed in **Figure S4 to Figure 21**. In these cohorts, the  
269 distribution of immune activated subgroups ranged from 11.3% to 30.9%, while the  
270 proportion of immune exhausted subgroups ranged from 17.1% to 40.8%. We also  
271 observed the increased scores of immune enrichment signature and immune signaling  
272 signature in the 18 validation cohorts, as well as the other immunocytes signatures. As  
273 expected, the subgroup of immune exhausted shown an increased enrichment score of  
274 Treg cells, TITR, MDSC, WNT/TGF $\beta$ , and C-ECM signatures. Taken together, combined  
275 results from **Table S5, Figure 6, and Figure S4 to S21**, our results suggest that the NMF  
276 and NTP algorithms could stably and precisely divide bladder patients into immune  
277 activated, immune exhausted and non-immune phenotypes. The specific immune  
278 characteristics could reappearing in any bladder cancer patients cohort.

### 279 **Immune activated subgroup shows favorable prognosis and benefits more from** 280 **anti-PD-1 therapy**

281 We collected the overall survival status and time form the TCGA-BLCA, GSE32894,  
282 GSE13507 and E-MTAB-1803 cohorts. The prognosis of patients in the three  
283 immunophenotypes are dramatically difference. In TCGA-BLCA cohort, we observed the  
284 best OS outcome in immune activated subgroup among patients older than 70 years old,  
285 while the survival plots of immune exhausted subgroup and non-immune class mixed  
286 (**Figure 7A**,  $P = 0.45$ ). What's more, the prognosis obviously distinguished between the  
287 three immunophenotypes in GSE32894 cohort (**Figure 7A**,  $P < 0.001$ ). Patients in the

288 immune activated subgroup all alive at the end of follow-up, patients belong to the non-  
289 immune class shown a low rate of death, 5.96% (9/151), while about one thirds patients  
290 (16/47) in the immune exhausted subgroup met the death end. The similar tendency of  
291 better prognosis in immune activated subgroup, worse prognosis in immune exhausted  
292 subgroup was also observed in E-MTAB-1803 cohort and GSE13507 cohort (**Figure 7A**).

293 Subsequently, we predict the potential response to anti-PD-1 and CTLA4 therapy of the  
294 patients in difference immunophenotypes. The module of SubMap in GenePattern was  
295 employed to compare the similarity of gene expression profile between the  
296 immunophenotypes and responders of anti-CTLA-4 or anti-PD-1 in the metastatic  
297 melanoma immunotherapy cohort. We successfully generated the results that patients in  
298 the immune activated subgroups could benefit more from the treatment of anti-PD-1  
299 therapy but not anti-CTLA-4 therapy in TCGA-BLCA, GSE32894, and E-MTAB-1803  
300 cohorts (Bonferroni-corrected  $P < 0.05$ , **Figure 7B**). Taken together of the results from  
301 **Figure 7**, we generated the conclusion of that patients in the immune activated subgroup  
302 have the longest average overall survival and could benefit more from the anti-PD-1  
303 therapy.

#### 304 **Correlate three immunophenotypes with proposed molecular subtypes**

305 We also sought to integrate the immunophenotypes with the prior established immune  
306 molecular features. Thorsson *et al.*<sup>35</sup> generated a six-subtype immune molecular feature,  
307 including wound healing (C1), IFN- $\gamma$  dominant (C2), inflammatory (C3), lymphocyte  
308 depleted (C4), immunologically quiet (C5), and TGF- $\beta$  dominant (C6). We found that most  
309 patients in the immune activated subgroup (75.00%) belong to the IFN- $\gamma$  group, which  
310 associated with a strong CD8 signal and a high proliferation rate, and about 68.22%  
311 patients in the immune exhausted subgroup also belong to the IFN-  $\gamma$  group (**Figure 8A**).

312 Kamoun et al.<sup>36</sup> identified a consensus set of six molecular classes: luminal papillary (24%),  
313 luminal nonspecified (8%), luminal unstable (15%), stroma-rich (15%), basal/squamous  
314 (35%), and neuroendocrine-like (3%). In the current study, we revealed that most immune  
315 exhausted patients and half of immune activated patients belong to the basal/squamous  
316 classes (**Figure 8B**), which with the most frequently mutated genes of TP53, consistent  
317 with what we generated previously (**Figure 5A**). Unquestionably, the Ba/sq subclass  
318 associated with the poor prognosis, and patients in the immune exhausted subgroup also  
319 shown the poor prognosis.

## 320 **DISCUSSION**

321 Bladder cancer is a heavy health burden all over the world, especially at Europe and  
322 Northern America<sup>2</sup>. The major challenge of bladder cancer clinical care is the short-term  
323 recurrence of NMIBC, as well as the shorten overall survival of MIBC patients, especially  
324 for those with distant metastases, with the 5-year survival rate less than 10%<sup>7,37</sup>. Iridates  
325 from the molecular side, bladder cancer is composed by a mass of heterogenetic  
326 characteristics, impacting by the gene mutation, gene copy number alteration,  
327 neoantigens, as well as the infiltration of immunocytes. Several teams established the  
328 molecular classifications among bladder cancer. Mo et al.<sup>38</sup> generated a tumor 18-gene  
329 signature in MIBC patients, which could reflect the urothelial differentiation and predict the  
330 clinical outcomes, basal and differentiated groups was named to the two group with high  
331 or low risk score, respectively. Damrauer *et al.*<sup>39</sup> developed BASE47, a transcriptomic  
332 classifier using 47 genes, to classify the MIBC tumor into luminal-like or basal-like subtype.  
333 Robertson et al.<sup>40</sup> performed a Bayesian NMF with consensus hierarchical clustering in  
334 408 MIBC tumors from TCGA and found five expression subtypes, including three luminal  
335 subtypes (named Luminal-papillary, Luminal-Infiltrated and Luminal), Basal/Squamous  
336 subtype, and Neuronal subtype. However, most of the molecular classifiers only focused

337 on the clinical outcomes, but not the tumor immune microenvironment. Therefore, our goal  
338 is to provide a comprehensive insight to the immune response of bladder cancer patients  
339 with diverse inner molecular features, and help to find the suitable patients undergo the  
340 precise immunotherapy.

341 NMF algorithm is an unsupervised, parts-based learning paradigm, which could  
342 decompose a nonnegative matrix  $V$  into two nonnegative matrices,  $W$  and  $H$ , via a  
343 multiplicative updates algorithm<sup>41</sup>. Similarly to principal components analysis (PCA) or  
344 independent component analysis (ICA), the objective of NMF is to explain the observed  
345 data using a limited number of basic components, which could reflect the original data as  
346 accurately as possible<sup>42</sup>. NMF was applied to reveal the biomarkers, classify the tumor  
347 subtypes and predict the prognosis of tumors recent days<sup>43-45</sup>. As for the enrolled 4,003  
348 bladder cancer patients. We investigated a robust classification of three  
349 immunophenotypes based on the NMF algorithm. Firstly, we identified the immune  
350 activated subgroup, immune exhausted subgroup and non-immune class in the 408  
351 bladder cancer patients from TCGA-BLCA cohort. The 150 exemplar genes from immune  
352 module represented the immune feature in bladder cancer patients and further divide the  
353 whole cohort to immune and non-immune classes. The other 150 DEGs among the  
354 immune and non-immune classes was extracted as the input profile for the validation of  
355 the classification in external 19 cohorts. As to the distinguish of immune activated and  
356 immune exhausted subgroup, a stromal activation signature was conducted by NTP  
357 algorithm. The features of these three immunophenotypes was illuminated by several  
358 verified signatures of immunocytes or immune signaling pathways. Patients in the immune  
359 classes shown the highly enriched signatures of T cell, B cell, IFN and CYT<sup>46-48</sup>, while the  
360 exhausted subgroup also shown an increased signature of TITR, WNT/TGF- $\beta$ , TGF- $\beta$ 1  
361 activated, and C-ECM signatures<sup>49-51</sup>, but not the immune activated subgroup. Totally,

362 based on our results, we revealed that there are only about 11% to 30.9% bladder cancer  
363 patients belong to the immune activated subgroup, which might response to the  
364 immunotherapy.

365 Clinical outcome is an important factor we focused about the newly defined  
366 immunophenotypes. With the clinical information of TCGA-BLCA, GSE32894, E-MTAB-  
367 1803 and GSE13507 cohorts, we generated the results that patients belong to the immune  
368 activated subgroup contain the best overall survival, while the immune exhausted  
369 subgroup shown the worst clinical outcome of a shorten overall survival time. Immune  
370 exhausted, mostly focused on the exhausted of T cell, reflected by the altered  
371 inflammatory and tissue microenvironments, lymphocyte, as well as the inhibitory signals  
372 from cytokines<sup>52</sup>. These alternations in the TIME could lead to the escape of the immune  
373 recognition by blocking of the immune checkpoints, and related with the unfavorable  
374 overall survival for patients<sup>53</sup>. We predicted the potential response to immunotherapy of  
375 the bladder cancer patients by compared the mRNA expression profile with melanoma  
376 samples receiving anti-CTLA-4 or anti-PD-1 checkpoint therapy. As expected, patients in  
377 the immune activated subgroup could benefit from the treatment of an-PD-1 therapy, but  
378 not the non-immune activated subgroup, which combined the immune exhausted and non-  
379 immune classes.

380 To further understanding the molecular diverse among there three immunophenotypes,  
381 we compared the CNA, TMB, and gene mutations. Recent studies report the association  
382 of CNA with the increased immune infiltration and the outcome of immune checkpoint  
383 blockade therapy<sup>54,55</sup>. Patients in the immune class shown a lower CNA burden in gene  
384 deletion among arm- and focal-level. The association was double checked by that the  
385 deletion copy number of PD-1, PD-L1 and CTLA4 is positively with the decrease infiltration  
386 level of immunocytes. Tripathi et al.<sup>56</sup> found that antigen presentation through MHC class



387 I pathway is suppressed in tumors with high chromosomal instability, also known as the  
388 high CNA, which acts as a pivotal role in the immune evasion. In addition, Lu et al.<sup>57</sup>  
389 revealed that patients treated with immune-checkpoint-blockade therapy could get a  
390 durable clinical benefit and better survival, if the contains the lower burden of CNA. Gene  
391 mutation is another key component we focused among the three immunophenotypes. We  
392 extracted the specific mutant genes for each subgroup. The proportion of mutant TP53,  
393 TTN, PIK3CA and RB1 is higher in immune class than non-immune class. Nusrat et al.<sup>58</sup>  
394 reported that colorectal cancer patients with the mutant PIK3CA have a higher median  
395 density of CD3+ and CD8+ cells, as well as a high rate of clinical benefit from  
396 immunotherapy (50% vs. 8.6%). What's more, we observed the high rate of ERBB2  
397 mutation in immune activated subgroup. ERBB2 amplification or overexpression was a  
398 biomarker of anti-ERBB2 target therapy in breast cancer, the activated ERBB2 oncogene  
399 regulates recruitment and activation of tumor infiltrating immune cells and trastuzumab  
400 activity by inducing CCL2 and PD-1 ligands<sup>59</sup>. The V659E mutation of ERBB2 gene was  
401 also reported associated with the altering sensitivity of afatinib and lapatinib treatment in  
402 in vitro<sup>60,61</sup>. The mutation proportion of EP300 is highest in immune exhausted subgroup.  
403 Recent research concerned the importance of CBP/EP300 in regulatory T cells (Treg),  
404 because conditional deletion of either EP300 or CBP in mouse Tregs led to impaired Treg  
405 suppressive function<sup>62</sup>. Intratumoral Tregs dampen effector T cell responses to tumor  
406 antigens, engendering an immunosuppressive microenvironment, and linked with a poor  
407 prognosis in tumors<sup>63</sup>.

408 We defined and validated a novel classifier among the 4003 bladder cancer patients, to  
409 separate the bladder cancer patients to immune activated, immune suppressed and non-  
410 immune subgroups. Patients in the immune activated subgroup could benefit more from  
411 the single treatment of anti-PD-1 immunotherapy; As to the immune exhausted subgroup,

412 ICB therapy plus TGF- $\beta$  inhibitor or EP300 inhibitor might be more effectiveness. In  
413 summary, our novel classifier provide illumination for the enhancing immunotherapy of  
414 bladder cancer patients.

415

#### 416 **Data availability statement**

417 All data used in this work can be acquired from the GDC portal  
418 (<https://portal.gdc.cancer.gov/>), Gene-Expression Omni-bus (GEO;  
419 <https://www.ncbi.nlm.nih.gov/geo/>), and ArrayExpress  
420 (<https://www.ebi.ac.uk/arrayexpress/>).

#### 421 **Acknowledgements**

422 This work was supported by the National Natural Science Foundation of China [grant  
423 number: 81802827, 81630019, 31701162]; Scientific Research Foundation of the Institute  
424 for Translational Medicine of Anhui Province [grant number: 2017ZHXY02]; The Natural  
425 Science Foundation of Guangdong Province, China [grant number: 2017A030313800];  
426 The Key Project of Provincial Natural Science Research Project of Anhui Colleges [grant  
427 number: KJ2019A0278]; Supporting Project for Distinguished Young Scholar of Anhui  
428 Colleges [grant number: gxyqZD2019018]; 2017 Anhui Province special program for  
429 guiding local science and technology development by the central government [grant  
430 number: 2017070802D148].

#### 431 **Conflict of interests**

432 The authors have declared no conflicts of interest.

#### 433 **Ethics approval**

434 The patient data in this work acquired from the publicly available datasets whose informed  
435 consent of patients were complete. For the AHMU-PC cohort, the research contents and  
436 research programs were reviewed and approved by the Ethics Committee of the First  
437 Affiliated Hospital of Anhui Medical University (PJ-2019-09-11), patient consent for the  
438 retrospective cohorts was waived.

#### 439 **Authors' contributions**

440 Conception and Design: Jialin Meng, Xiaofan Lu, Fangrong Yan and Chaozhao Liang.  
441 Collection and Assembly of Data: Yujie Zhou, Xiaofan Lu, Meng Zhang, Yinan Du, Jun  
442 Zhou. Data Analysis and Interpretation: Jialin Meng, Yujie Zhou, Xiaofan Lu, Zongyao Hao.  
443 Manuscript Writing: Jialin Meng, Xiaofan Lu, Yujie Zhou, Meng Zhang. Final Approval of  
444 Manuscript: All the authors.

#### 445 **REFERENCES:**

- 446 1 Sanchez, A. *et al.* Incidence, Clinicopathological Risk Factors, Management and  
447 Outcomes of Nonmuscle Invasive Recurrence after Complete Response to  
448 Trimodality Therapy for Muscle Invasive Bladder Cancer. *J Urol* **199**, 407-415,  
449 doi:10.1016/j.juro.2017.08.106 (2018).
- 450 2 Bray, F. *et al.* Global cancer statistics 2018: GLOBOCAN estimates of incidence  
451 and mortality worldwide for 36 cancers in 185 countries. *CA Cancer J Clin* **68**,  
452 394-424, doi:10.3322/caac.21492 (2018).
- 453 3 Siegel, R. L., Miller, K. D. & Jemal, A. Cancer statistics, 2020. *CA Cancer J Clin*  
454 **70**, 7-30, doi:10.3322/caac.21590 (2020).
- 455 4 Kamat, A. M. *et al.* Bladder cancer. *Lancet* **388**, 2796-2810, doi:10.1016/S0140-  
456 6736(16)30512-8 (2016).
- 457 5 Gandhi, N. M., Morales, A. & Lamm, D. L. Bacillus Calmette-Guerin  
458 immunotherapy for genitourinary cancer. *BJU Int* **112**, 288-297,  
459 doi:10.1111/j.1464-410X.2012.11754.x (2013).
- 460 6 Bellmunt, J. *et al.* Bladder cancer: ESMO Practice Guidelines for diagnosis,  
461 treatment and follow-up. *Ann Oncol* **25 Suppl 3**, iii40-48,  
462 doi:10.1093/annonc/mdu223 (2014).
- 463 7 Chamie, K. *et al.* Recurrence of high-risk bladder cancer: a population-based  
464 analysis. *Cancer* **119**, 3219-3227, doi:10.1002/cncr.28147 (2013).
- 465 8 Pectasides, D., Pectasides, M. & Nikolaou, M. Adjuvant and neoadjuvant  
466 chemotherapy in muscle invasive bladder cancer: literature review. *Eur Urol* **48**,  
467 60-67; discussion 67-68, doi:10.1016/j.eururo.2005.03.025 (2005).
- 468 9 Kalinski, P. *Tumor Immune Microenvironment in Cancer Progression and Cancer*  
469 *Therapy*. Vol. 1036 (Springer International Publishing, 2017).

- 470 10 Akaza, H. BCG treatment of existing Ta, T1 tumours or carcinoma in situ of the  
471 bladder. *Eur Urol* **27 Suppl 1**, 9-12, doi:10.1159/000475202 (1995).
- 472 11 Balar, A. V. *et al.* Atezolizumab as first-line treatment in cisplatin-ineligible  
473 patients with locally advanced and metastatic urothelial carcinoma: a single-arm,  
474 multicentre, phase 2 trial. *Lancet* **389**, 67-76, doi:10.1016/S0140-6736(16)32455-  
475 2 (2017).
- 476 12 Rosenberg, J. E. *et al.* Atezolizumab in patients with locally advanced and  
477 metastatic urothelial carcinoma who have progressed following treatment with  
478 platinum-based chemotherapy: a single-arm, multicentre, phase 2 trial. *Lancet*  
479 **387**, 1909-1920, doi:10.1016/S0140-6736(16)00561-4 (2016).
- 480 13 Sharma, P. *et al.* Nivolumab monotherapy in recurrent metastatic urothelial  
481 carcinoma (CheckMate 032): a multicentre, open-label, two-stage, multi-arm,  
482 phase 1/2 trial. *Lancet Oncol* **17**, 1590-1598, doi:10.1016/S1470-2045(16)30496-  
483 X (2016).
- 484 14 Sharma, P. *et al.* Nivolumab in metastatic urothelial carcinoma after platinum  
485 therapy (CheckMate 275): a multicentre, single-arm, phase 2 trial. *Lancet Oncol*  
486 **18**, 312-322, doi:10.1016/S1470-2045(17)30065-7 (2017).
- 487 15 Powles, T. *et al.* Efficacy and Safety of Durvalumab in Locally Advanced or  
488 Metastatic Urothelial Carcinoma: Updated Results From a Phase 1/2 Open-label  
489 Study. *JAMA Oncol* **3**, e172411, doi:10.1001/jamaoncol.2017.2411 (2017).
- 490 16 Patel, M. R. *et al.* Avelumab in metastatic urothelial carcinoma after platinum  
491 failure (JAVELIN Solid Tumor): pooled results from two expansion cohorts of an  
492 open-label, phase 1 trial. *Lancet Oncol* **19**, 51-64, doi:10.1016/S1470-  
493 2045(17)30900-2 (2018).
- 494 17 Lee, D. D. & Seung, H. S. Learning the parts of objects by non-negative matrix  
495 factorization. *Nature* **401**, 788-791, doi:10.1038/44565 (1999).
- 496 18 Yoshihara, K. *et al.* Inferring tumour purity and stromal and immune cell  
497 admixture from expression data. *Nat Commun* **4**, 2612,  
498 doi:10.1038/ncomms3612 (2013).
- 499 19 Sia, D. *et al.* Identification of an Immune-specific Class of Hepatocellular  
500 Carcinoma, Based on Molecular Features. *Gastroenterology* **153**, 812-826,  
501 doi:10.1053/j.gastro.2017.06.007 (2017).
- 502 20 Moffitt, R. A. *et al.* Virtual microdissection identifies distinct tumor- and stroma-  
503 specific subtypes of pancreatic ductal adenocarcinoma. *Nat Genet* **47**, 1168-  
504 1178, doi:10.1038/ng.3398 (2015).
- 505 21 Valkenburg, K. C., de Groot, A. E. & Pienta, K. J. Targeting the tumour stroma to  
506 improve cancer therapy. *Nat Rev Clin Oncol* **15**, 366-381, doi:10.1038/s41571-  
507 018-0007-1 (2018).
- 508 22 Hanahan, D. & Coussens, L. M. Accessories to the crime: functions of cells  
509 recruited to the tumor microenvironment. *Cancer Cell* **21**, 309-322,  
510 doi:10.1016/j.ccr.2012.02.022 (2012).
- 511 23 Sivanathan, K. N., Gronthos, S., Rojas-Canales, D., Thierry, B. & Coates, P. T.  
512 Interferon-gamma modification of mesenchymal stem cells: implications of  
513 autologous and allogeneic mesenchymal stem cell therapy in allotransplantation.  
514 *Stem Cell Rev Rep* **10**, 351-375, doi:10.1007/s12015-014-9495-2 (2014).
- 515 24 van Meegen, K. M. *et al.* Activated Mesenchymal Stromal Cells Process and  
516 Present Antigens Regulating Adaptive Immunity. *Front Immunol* **10**, 694,  
517 doi:10.3389/fimmu.2019.00694 (2019).
- 518 25 Soboslay, P. T. *et al.* Regulatory effects of Th1-type (IFN-gamma, IL-12) and  
519 Th2-type cytokines (IL-10, IL-13) on parasite-specific cellular responsiveness in

- 520 Onchocerca volvulus-infected humans and exposed endemic controls.  
521 *Immunology* **97**, 219-225, doi:10.1046/j.1365-2567.1999.00018.x (1999).
- 522 26 Aggarwal, S. & Pittenger, M. F. Human mesenchymal stem cells modulate  
523 allogeneic immune cell responses. *Blood* **105**, 1815-1822, doi:10.1182/blood-  
524 2004-04-1559 (2005).
- 525 27 Selleri, S. *et al.* Cord-blood-derived mesenchymal stromal cells downmodulate  
526 CD4+ T-cell activation by inducing IL-10-producing Th1 cells. *Stem Cells Dev* **22**,  
527 1063-1075, doi:10.1089/scd.2012.0315 (2013).
- 528 28 Batlle, E. & Massague, J. Transforming Growth Factor-beta Signaling in  
529 Immunity and Cancer. *Immunity* **50**, 924-940, doi:10.1016/j.immuni.2019.03.024  
530 (2019).
- 531 29 Furukawa, A., Wisel, S. A. & Tang, Q. Impact of Immune-Modulatory Drugs on  
532 Regulatory T Cell. *Transplantation* **100**, 2288-2300,  
533 doi:10.1097/TP.0000000000001379 (2016).
- 534 30 Groth, C. *et al.* Immunosuppression mediated by myeloid-derived suppressor  
535 cells (MDSCs) during tumour progression. *Br J Cancer* **120**, 16-25,  
536 doi:10.1038/s41416-018-0333-1 (2019).
- 537 31 Berraondo, P. *et al.* Cytokines in clinical cancer immunotherapy. *Br J Cancer*  
538 **120**, 6-15, doi:10.1038/s41416-018-0328-y (2019).
- 539 32 Dong, Y. *et al.* CD4(+) T cell exhaustion revealed by high PD-1 and LAG-3  
540 expression and the loss of helper T cell function in chronic hepatitis B. *BMC*  
541 *Immunol* **20**, 27, doi:10.1186/s12865-019-0309-9 (2019).
- 542 33 Liu, J. F. *et al.* Blockade of TIM3 relieves immunosuppression through reducing  
543 regulatory T cells in head and neck cancer. *J Exp Clin Cancer Res* **37**, 44,  
544 doi:10.1186/s13046-018-0713-7 (2018).
- 545 34 Saltz, J. *et al.* Spatial Organization and Molecular Correlation of Tumor-Infiltrating  
546 Lymphocytes Using Deep Learning on Pathology Images. *Cell Rep* **23**, 181-193  
547 e187, doi:10.1016/j.celrep.2018.03.086 (2018).
- 548 35 Thorsson, V. *et al.* The Immune Landscape of Cancer. *Immunity* **48**, 812-830  
549 e814, doi:10.1016/j.immuni.2018.03.023 (2018).
- 550 36 Kamoun, A. *et al.* A Consensus Molecular Classification of Muscle-invasive  
551 Bladder Cancer. *Eur Urol* **77**, 420-433, doi:10.1016/j.eururo.2019.09.006 (2020).
- 552 37 Hautmann, R. E., Gschwend, J. E., de Petroni, R. C., Kron, M. & Volkmer, B. G.  
553 Cystectomy for transitional cell carcinoma of the bladder: results of a surgery  
554 only series in the neobladder era. *J Urol* **176**, 486-492; discussion 491-482,  
555 doi:10.1016/j.juro.2006.03.038 (2006).
- 556 38 Mo, Q. *et al.* Prognostic Power of a Tumor Differentiation Gene Signature for  
557 Bladder Urothelial Carcinomas. *J Natl Cancer Inst* **110**, 448-459,  
558 doi:10.1093/jnci/djx243 (2018).
- 559 39 Damrauer, J. S. *et al.* Intrinsic subtypes of high-grade bladder cancer reflect the  
560 hallmarks of breast cancer biology. *Proc Natl Acad Sci U S A* **111**, 3110-3115,  
561 doi:10.1073/pnas.1318376111 (2014).
- 562 40 Robertson, A. G. *et al.* Comprehensive Molecular Characterization of Muscle-  
563 Invasive Bladder Cancer. *Cell* **171**, 540-556 e525, doi:10.1016/j.cell.2017.09.007  
564 (2017).
- 565 41 Devarajan, K. Nonnegative matrix factorization: an analytical and interpretive tool  
566 in computational biology. *PLoS Comput Biol* **4**, e1000029,  
567 doi:10.1371/journal.pcbi.1000029 (2008).
- 568 42 Gaujoux, R. & Seoighe, C. A flexible R package for nonnegative matrix  
569 factorization. *BMC Bioinformatics* **11**, 367, doi:10.1186/1471-2105-11-367  
570 (2010).

- 571 43 Zeng, Z. *et al.* Cancer classification and pathway discovery using non-negative  
572 matrix factorization. *J Biomed Inform* **96**, 103247, doi:10.1016/j.jbi.2019.103247  
573 (2019).
- 574 44 Esposito, F., Boccarelli, A. & Del Buono, N. An NMF-Based Methodology for  
575 Selecting Biomarkers in the Landscape of Genes of Heterogeneous Cancer-  
576 Associated Fibroblast Populations. *Bioinform Biol Insights* **14**,  
577 1177932220906827, doi:10.1177/1177932220906827 (2020).
- 578 45 Meng, J. *et al.* Immune Response Drives Outcomes in Prostate Cancer:  
579 Implications for Immunotherapy. *bioRxiv*, 2020.2005.2026.117218,  
580 doi:10.1101/2020.05.26.117218 (2020).
- 581 46 Iglesia, M. D. *et al.* Prognostic B-cell signatures using mRNA-seq in patients with  
582 subtype-specific breast and ovarian cancer. *Clin Cancer Res* **20**, 3818-3829,  
583 doi:10.1158/1078-0432.CCR-13-3368 (2014).
- 584 47 Bindea, G. *et al.* Spatiotemporal dynamics of intratumoral immune cells reveal  
585 the immune landscape in human cancer. *Immunity* **39**, 782-795,  
586 doi:10.1016/j.immuni.2013.10.003 (2013).
- 587 48 Chow, L. Q. M. *et al.* Biomarkers and response to pembrolizumab (pembro) in  
588 recurrent/metastatic head and neck squamous cell carcinoma (R/M HNSCC).  
589 *Journal of Clinical Oncology* **34**, 6010-6010,  
590 doi:10.1200/JCO.2016.34.15\_suppl.6010 (2016).
- 591 49 Magnuson, A. M. *et al.* Identification and validation of a tumor-infiltrating Treg  
592 transcriptional signature conserved across species and tumor types. *Proc Natl*  
593 *Acad Sci U S A* **115**, E10672-E10681, doi:10.1073/pnas.1810580115 (2018).
- 594 50 Lachenmayer, A. *et al.* Wnt-pathway activation in two molecular classes of  
595 hepatocellular carcinoma and experimental modulation by sorafenib. *Clin Cancer*  
596 *Res* **18**, 4997-5007, doi:10.1158/1078-0432.CCR-11-2322 (2012).
- 597 51 Chakravarthy, A., Khan, L., Bensler, N. P., Bose, P. & De Carvalho, D. D. TGF-  
598 beta-associated extracellular matrix genes link cancer-associated fibroblasts to  
599 immune evasion and immunotherapy failure. *Nat Commun* **9**, 4692,  
600 doi:10.1038/s41467-018-06654-8 (2018).
- 601 52 Wherry, E. J. & Kurachi, M. Molecular and cellular insights into T cell exhaustion.  
602 *Nat Rev Immunol* **15**, 486-499, doi:10.1038/nri3862 (2015).
- 603 53 Sharma, P., Hu-Lieskovan, S., Wargo, J. A. & Ribas, A. Primary, Adaptive, and  
604 Acquired Resistance to Cancer Immunotherapy. *Cell* **168**, 707-723,  
605 doi:10.1016/j.cell.2017.01.017 (2017).
- 606 54 Chan, T. A., Wolchok, J. D. & Snyder, A. Genetic Basis for Clinical Response to  
607 CTLA-4 Blockade in Melanoma. *N Engl J Med* **373**, 1984,  
608 doi:10.1056/NEJMc1508163 (2015).
- 609 55 Davoli, T., Uno, H., Wooten, E. C. & Elledge, S. J. Tumor aneuploidy correlates  
610 with markers of immune evasion and with reduced response to immunotherapy.  
611 *Science* **355**, doi:10.1126/science.aaf8399 (2017).
- 612 56 Tripathi, R., Modur, V., Senovilla, L., Kroemer, G. & Komurov, K. Suppression of  
613 tumor antigen presentation during aneuploid tumor evolution contributes to  
614 immune evasion. *Oncoimmunology* **8**, 1657374,  
615 doi:10.1080/2162402X.2019.1657374 (2019).
- 616 57 Lu, Z. *et al.* Tumor copy-number alterations predict response to immune-  
617 checkpoint-blockade in gastrointestinal cancer. *J Immunother Cancer* **8**,  
618 doi:10.1136/jitc-2019-000374 (2020).
- 619 58 Nusrat, M. *et al.* Association of PIK3CA mutations (mut) with immune  
620 engagement and clinical benefit from immunotherapy in microsatellite stable

- 621 (MSS) colorectal cancer (CRC) patients (pts). *Journal of Clinical Oncology* **37**,  
622 3604-3604, doi:10.1200/JCO.2019.37.15\_suppl.3604 (2019).
- 623 59 Triulzi, T. *et al.* HER2 signaling regulates the tumor immune microenvironment  
624 and trastuzumab efficacy. *Oncoimmunology* **8**, e1512942,  
625 doi:10.1080/2162402X.2018.1512942 (2019).
- 626 60 Serra, V. *et al.* Clinical response to a lapatinib-based therapy for a Li-Fraumeni  
627 syndrome patient with a novel HER2V659E mutation. *Cancer Discov* **3**, 1238-  
628 1244, doi:10.1158/2159-8290.CD-13-0132 (2013).
- 629 61 Yamamoto, H. *et al.* Therapeutic Potential of Afatinib for Cancers with ERBB2  
630 (HER2) Transmembrane Domain Mutations G660D and V659E. *Oncologist* **23**,  
631 150-154, doi:10.1634/theoncologist.2017-0345 (2018).
- 632 62 Liu, Y. *et al.* Two histone/protein acetyltransferases, CBP and p300, are  
633 indispensable for Foxp3+ T-regulatory cell development and function. *Mol Cell*  
634 *Biol* **34**, 3993-4007, doi:10.1128/MCB.00919-14 (2014).
- 635 63 Curiel, T. J. *et al.* Specific recruitment of regulatory T cells in ovarian carcinoma  
636 fosters immune privilege and predicts reduced survival. *Nat Med* **10**, 942-949,  
637 doi:10.1038/nm1093 (2004).

638

639

640

641

642

643

644

645

646

647

648

649 **Figure Legends**

650 **Figure 1. The flow chart demonstrates the summary of performed analysis in this**  
651 **study.** A total of 4,003 bladder cancer patients from 20 cohorts with the mRNA expression  
652 profile were enrolled for the analysis, with non-negative matrix factorization algorithm and  
653 nearest template prediction, three immunophenotypes were generated in TCGA-BLCA  
654 cohort, and validated in 19 external cohorts. The molecular characteristic, prognosis and  
655 response to immunotherapy are difference in the three subtypes. NMF, non-negative  
656 matrix factorization; TCGA-BLCA, The Cancer Genome Atlas-prostate adenocarcinoma  
657 bladder cancer; TIL, tumor-infiltrating lymphocytes; CNA, copy number alteration; TMB,  
658 tumor mutation burden.

659

660 **Figure 2. Recognition the immune classes by non-negative matrix factorization**  
661 **(NMF) algorithm**

662 (A) Nine modules generated from the NMF algorithm, patients with high immune  
663 enrichment score gathered in the immune module; (B) Heatmap showing the top 150  
664 exemplar genes expression among immune enriched and non-immune enriched clusters,  
665 divided by consensus clustering; (C) the multidimensional scaling (MDS) random forest  
666 further modified the clusters to immune and non-immune classes; (D) The distribution of  
667 patients in different NMF modules, immune module weight, exemplar gene clustering, final  
668 immune classes and immune enrichment score.

669 **Figure 3. The diverse immune characteristics of non-immune class, immune**  
670 **activated subgroup, and immune exhausted subgroup.**



671 Immune class (253/408, 62.0%) and non-immune class (155/408, 38.0%) were  
672 distinguished by the consensus clustering and multidimensional scaling random forest  
673 based on the 150 exemplar genes obtained from the non-negative matrix factorization  
674 algorithm generated immune module; The immune activated subgroup (45/408, 11.0%)  
675 and immune exhausted subgroup (110/408, 27.0%) further divided by the stromal  
676 activation signature with nearest template prediction analysis. The high and low gene set  
677 enrichment scores are displayed with red and green, respectively. The details of these  
678 immune associated signatures listed in Table S2. TCGA-BLCA, The Cancer Genome  
679 Atlas-bladder cancer; CYT, cytolytic activity score; TITR, tumor-infiltrating Tregs; MDSC,  
680 myeloid-derived suppressor cell; TLS, tertiary lymphoid structure; C-ECM, cancer-  
681 associated extracellular matrix.

682 **Figure 4. The heterogeneity of genetic phenotypes of non-immune class, immune**  
683 **activated subgroup, and immune exhausted subgroup.**

684 (A) Difference of tumor-infiltrating lymphocytes abundance; (B) Difference of PD-L1 mRNA  
685 expression level; (C) Difference of gene copy number alterations, including amplification  
686 and deletion, among arm-level and focal level; (D) Difference of tumor mutation burden;  
687 (E) Difference of neoantigens; (F) Different distribution of mutant genes in three  
688 immunophenotypes.

689 **Figure 5. The specific mutant genes of non-immune class, immune activated**  
690 **subgroup, and immune exhausted subgroup.**

691 (A) TP53, TTN, PIK3CA and RB1 are the specific mutant genes in immune class  
692 compared with non-immune class; (B) ERBB2, KMT2A, PKHD1 and MDN1 are the  
693 specific mutant genes in immune activated subgroup; (C) EP300, HMCN1, AKAP9 and  
694 MACF1 are the specific mutant genes in immune exhausted subgroup. IM, immune class;

695 Non-IM, non-immune class; IM-Act, immune activated subgroup; IM-Exh, immune  
696 exhausted subgroup.

697 **Figure 6. Reappearing the diverse immune characteristics of three**  
698 **immunophenotypes in GSE32894 cohort.**

699 CYT, cytolytic activity score; TITR, tumor-infiltrating Tregs; MDSC, myeloid-derived  
700 suppressor cell; TLS, tertiary lymphoid structure; C-ECM, cancer-associated extracellular  
701 matrix.

702 **Figure 7. Immunophenotypes indicate separated overall survival outcome and**  
703 **response to immunotherapy for bladder cancer patients**

704 (A) Different overall survival outcome in three immunophenotypes among patients high  
705 than 70 years old in TCGA-BLCA cohort, GSE32894 cohort, E-MTAB-1803 cohort, and  
706 GSE13507 cohort; (B) Subclass mapping analysis manifested that patients with immune  
707 activated subtype were more likely to respond to anti-PD-1 treatment.

708 **Figure 8. Correlate the three immunophenotypes with proposed molecular subtypes.**

709 (A) Association with Thorsson et al. generated pan-cancer six immune molecular features;  
710 (B) Association with Kamoun et al. identified the consensus set of six molecular classes.

711 **Figure S1. GSEA results showing the activated signaling pathways in the immune**  
712 **class.** NES, normalized enrichment score; FDR, false discovery rate; FDR less than  
713 0.05 indicates statistical significance.

714 **Figure S2. Stromal representative signatures and markers in immune activated**  
715 **and exhausted subgroups.** \*\*\*\*,  $P < 0.0001$ ; \*\*\*,  $P < 0.001$ ; \*\*,  $P < 0.01$ ; \*,  $P < 0.05$ ;  
716 ns, no significance.

717 **Figure S3. The association between copy number variation of immune**  
718 **checkpoints and immunocyte infiltration.** \*\*\*,  $P < 0.001$ ; \*\*,  $P < 0.01$ ; \*,  $P < 0.05$ .

719 **Figure S4. Successful validation of the immunophenotypes among the E-MTAB-**  
720 **4321 cohort.** CYT, cytolytic activity score; TITR, tumor-infiltrating Tregs; MDSC, myeloid-  
721 derived suppressor cell; TLS, tertiary lymphoid structure; C-ECM, cancer-associated  
722 extracellular matrix.

723 **Figure S5. Successful validation of the immunophenotypes among the IMvigor210**  
724 **cohort.** CYT, cytolytic activity score; TITR, tumor-infiltrating Tregs; MDSC, myeloid-  
725 derived suppressor cell; TLS, tertiary lymphoid structure; C-ECM, cancer-associated  
726 extracellular matrix.

727 **Figure S6. Successful validation of the immunophenotypes among the GSE83586**  
728 **cohort.** CYT, cytolytic activity score; TITR, tumor-infiltrating Tregs; MDSC, myeloid-  
729 derived suppressor cell; TLS, tertiary lymphoid structure; C-ECM, cancer-associated  
730 extracellular matrix.

731 **Figure S7. Successful validation of the immunophenotypes among the GSE87304**  
732 **cohort.** CYT, cytolytic activity score; TITR, tumor-infiltrating Tregs; MDSC, myeloid-  
733 derived suppressor cell; TLS, tertiary lymphoid structure; C-ECM, cancer-associated  
734 extracellular matrix.

735 **Figure S8. Successful validation of the immunophenotypes among the GSE128702**  
736 **cohort.** CYT, cytolytic activity score; TITR, tumor-infiltrating Tregs; MDSC, myeloid-

737 derived suppressor cell; TLS, tertiary lymphoid structure; C-ECM, cancer-associated  
738 extracellular matrix.

739 **Figure S9. Successful validation of the immunophenotypes among the GSE13507**  
740 **cohort.** CYT, cytolytic activity score; TITR, tumor-infiltrating Tregs; MDSC, myeloid-  
741 derived suppressor cell; TLS, tertiary lymphoid structure; C-ECM, cancer-associated  
742 extracellular matrix.

743 **Figure S10. Successful validation of the immunophenotypes among the GSE120736**  
744 **cohort.** CYT, cytolytic activity score; TITR, tumor-infiltrating Tregs; MDSC, myeloid-  
745 derived suppressor cell; TLS, tertiary lymphoid structure; C-ECM, cancer-associated  
746 extracellular matrix.

747 **Figure S11. Successful validation of the immunophenotypes among the GSE39016**  
748 **cohort.** CYT, cytolytic activity score; TITR, tumor-infiltrating Tregs; MDSC, myeloid-  
749 derived suppressor cell; TLS, tertiary lymphoid structure; C-ECM, cancer-associated  
750 extracellular matrix.

751 **Figure S12. Successful validation of the immunophenotypes among the GSE128701**  
752 **cohort.** CYT, cytolytic activity score; TITR, tumor-infiltrating Tregs; MDSC, myeloid-  
753 derived suppressor cell; TLS, tertiary lymphoid structure; C-ECM, cancer-associated  
754 extracellular matrix.

755 **Figure S13. Successful validation of the immunophenotypes among the GSE124035**  
756 **cohort.** CYT, cytolytic activity score; TITR, tumor-infiltrating Tregs; MDSC, myeloid-  
757 derived suppressor cell; TLS, tertiary lymphoid structure; C-ECM, cancer-associated  
758 extracellular matrix.

759 **Figure S14. Successful validation of the immunophenotypes among the GSE86411**  
760 **cohort.** CYT, cytolytic activity score; TITR, tumor-infiltrating Tregs; MDSC, myeloid-  
761 derived suppressor cell; TLS, tertiary lymphoid structure; C-ECM, cancer-associated  
762 extracellular matrix.

763 **Figure S15. Successful validation of the immunophenotypes among the GSE48276**  
764 **cohort.** CYT, cytolytic activity score; TITR, tumor-infiltrating Tregs; MDSC, myeloid-  
765 derived suppressor cell; TLS, tertiary lymphoid structure; C-ECM, cancer-associated  
766 extracellular matrix.

767 **Figure S16. Successful validation of the immunophenotypes among the GSE31684**  
768 **cohort.** CYT, cytolytic activity score; TITR, tumor-infiltrating Tregs; MDSC, myeloid-  
769 derived suppressor cell; TLS, tertiary lymphoid structure; C-ECM, cancer-associated  
770 extracellular matrix.

771 **Figure S17. Successful validation of the immunophenotypes among the GSE134292**  
772 **cohort.** CYT, cytolytic activity score; TITR, tumor-infiltrating Tregs; MDSC, myeloid-  
773 derived suppressor cell; TLS, tertiary lymphoid structure; C-ECM, cancer-associated  
774 extracellular matrix.

775 **Figure S18. Successful validation of the immunophenotypes among the GSE93257**  
776 **cohort.** CYT, cytolytic activity score; TITR, tumor-infiltrating Tregs; MDSC, myeloid-  
777 derived suppressor cell; TLS, tertiary lymphoid structure; C-ECM, cancer-associated  
778 extracellular matrix.

779 **Figure S19. Successful validation of the immunophenotypes among the E-MTAB-**  
780 **1803 cohort.** CYT, cytolytic activity score; TITR, tumor-infiltrating Tregs; MDSC, myeloid-

781 derived suppressor cell; TLS, tertiary lymphoid structure; C-ECM, cancer-associated  
782 extracellular matrix.

783 **Figure S20. Successful validation of the immunophenotypes among the GSE69795**  
784 **cohort.** CYT, cytolytic activity score; TITR, tumor-infiltrating Tregs; MDSC, myeloid-  
785 derived suppressor cell; TLS, tertiary lymphoid structure; C-ECM, cancer-associated  
786 extracellular matrix.

787 **Figure S21. Successful validation of the immunophenotypes among the GSE129871**  
788 **cohort.** CYT, cytolytic activity score; TITR, tumor-infiltrating Tregs; MDSC, myeloid-  
789 derived suppressor cell; TLS, tertiary lymphoid structure; C-ECM, cancer-associated  
790 extracellular matrix.

791

792

793

794

795

796

797

798

799

800

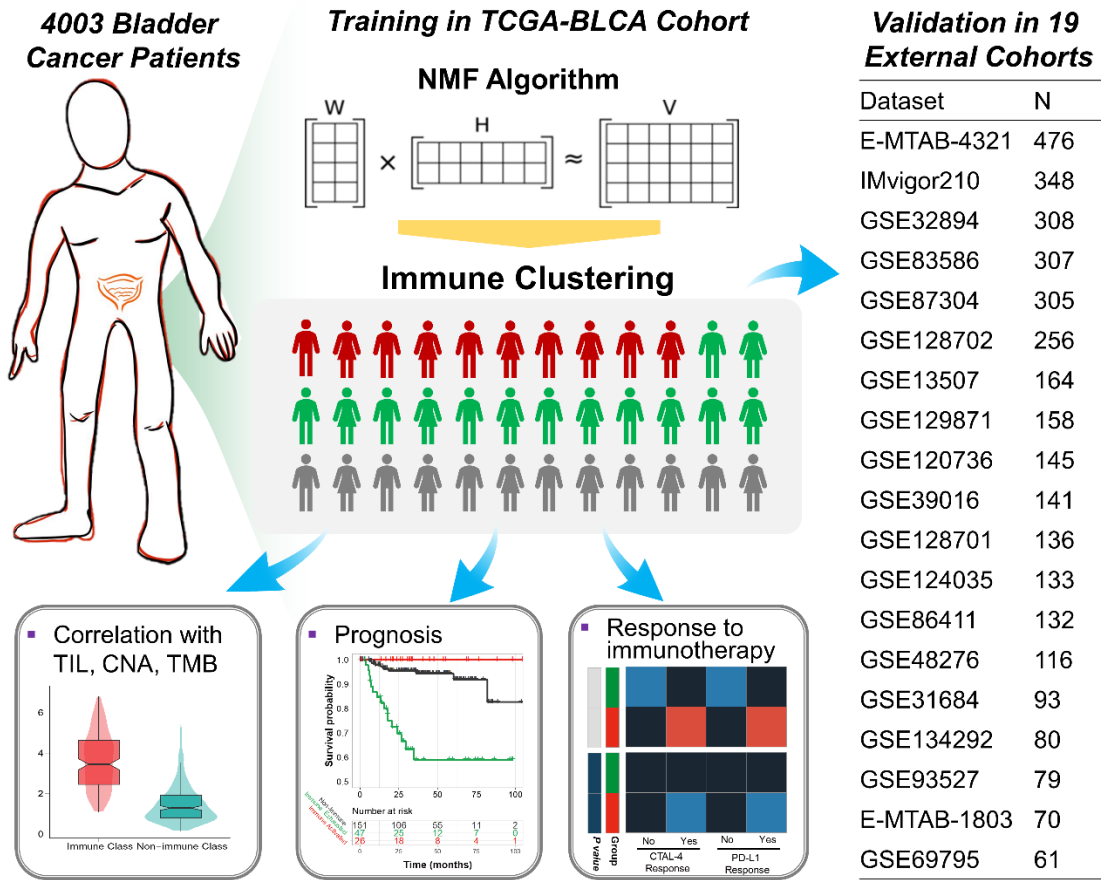

**Figure 1**

801

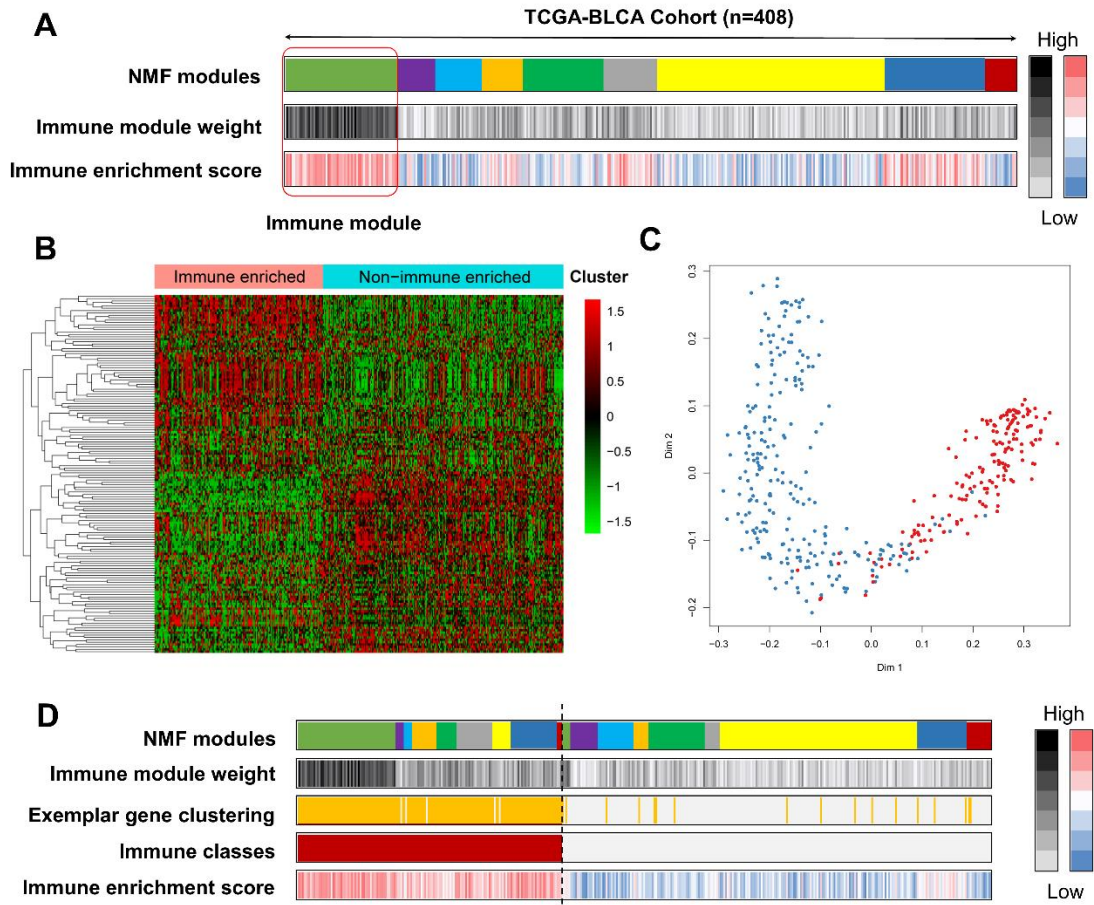

**Figure 2**

802



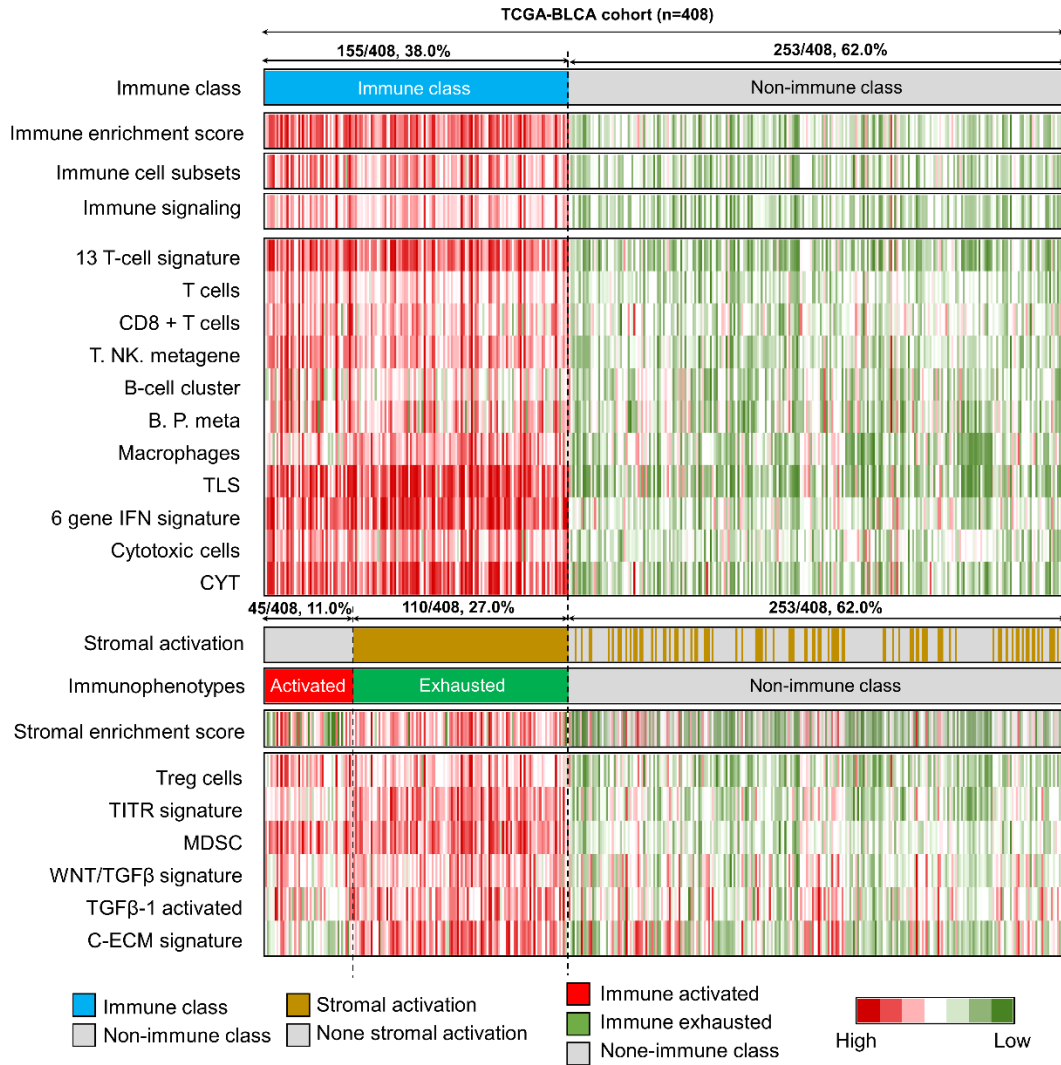

**Figure 3**

803

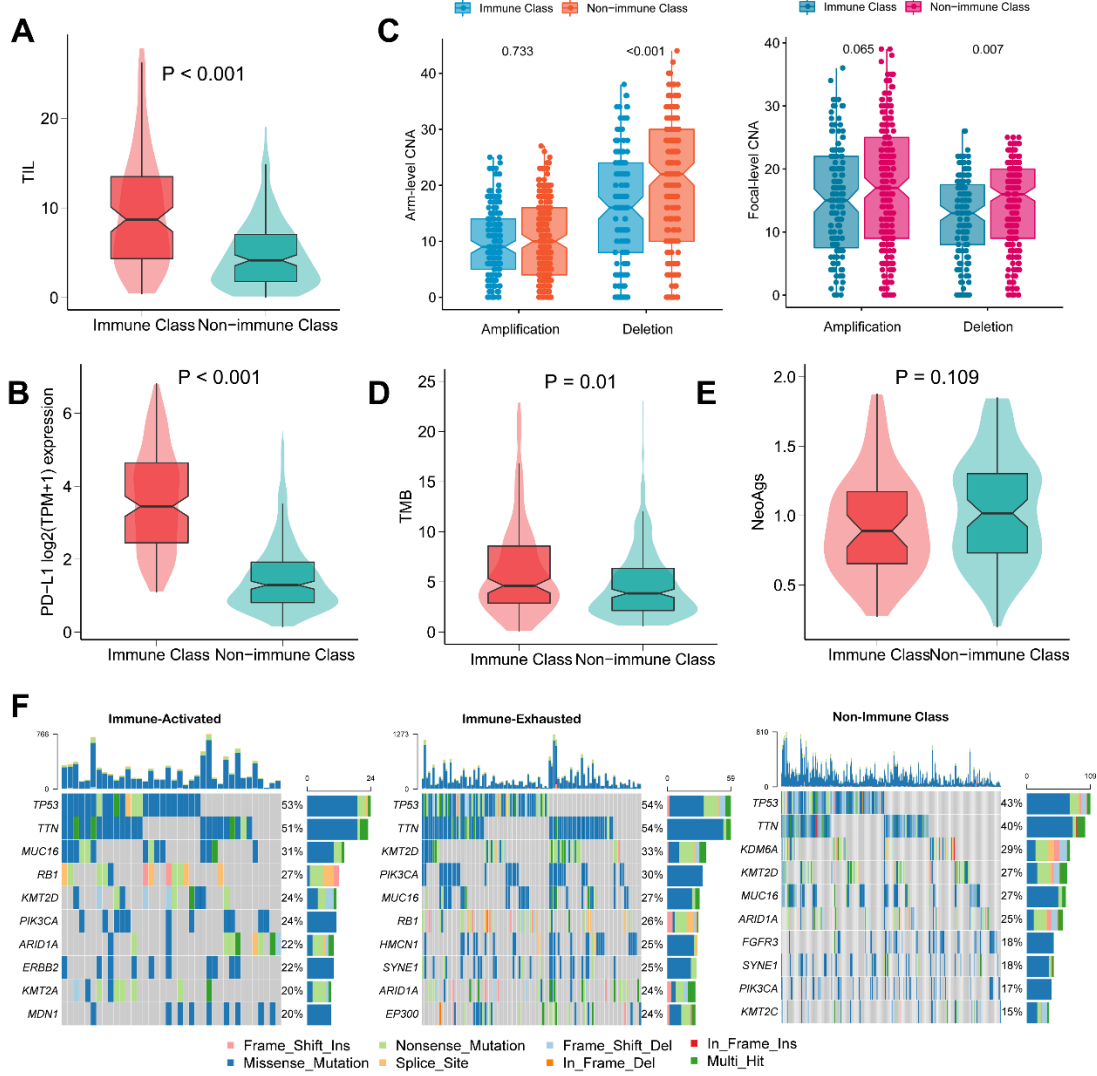

804

**Figure 4**

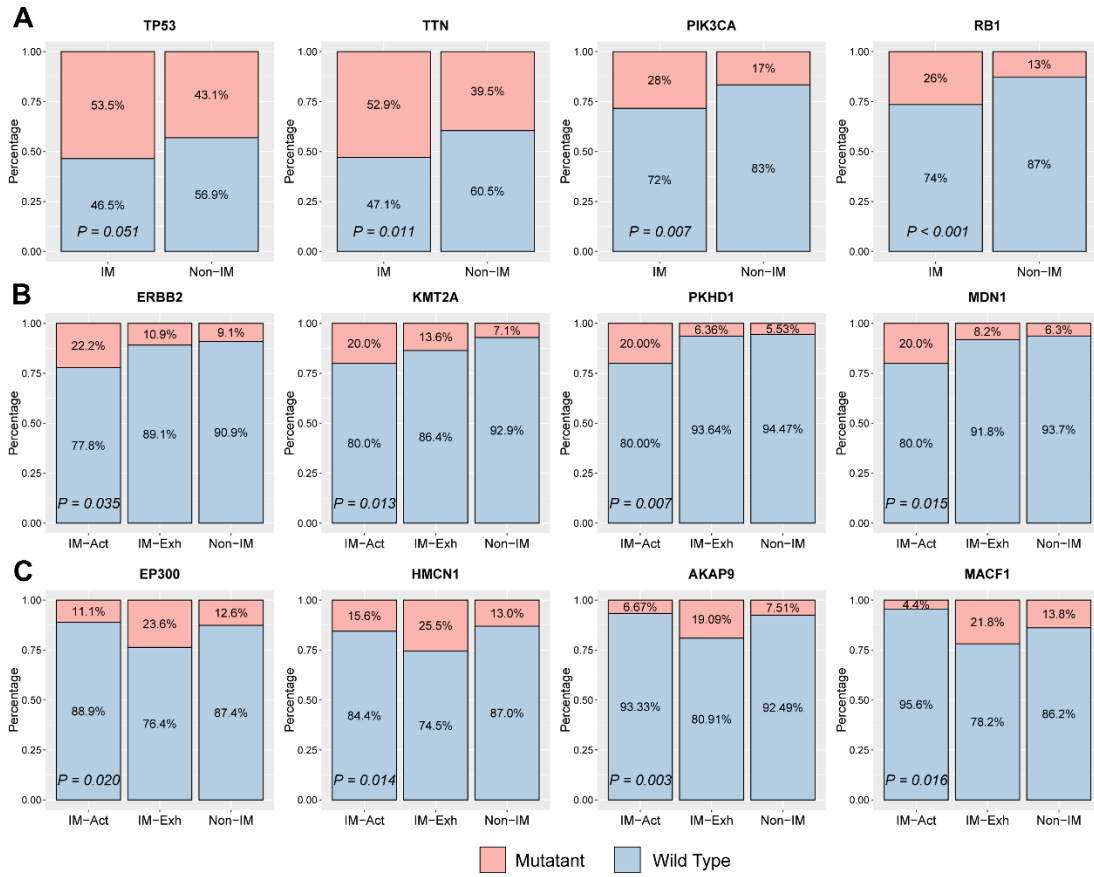

**Figure 5**

805

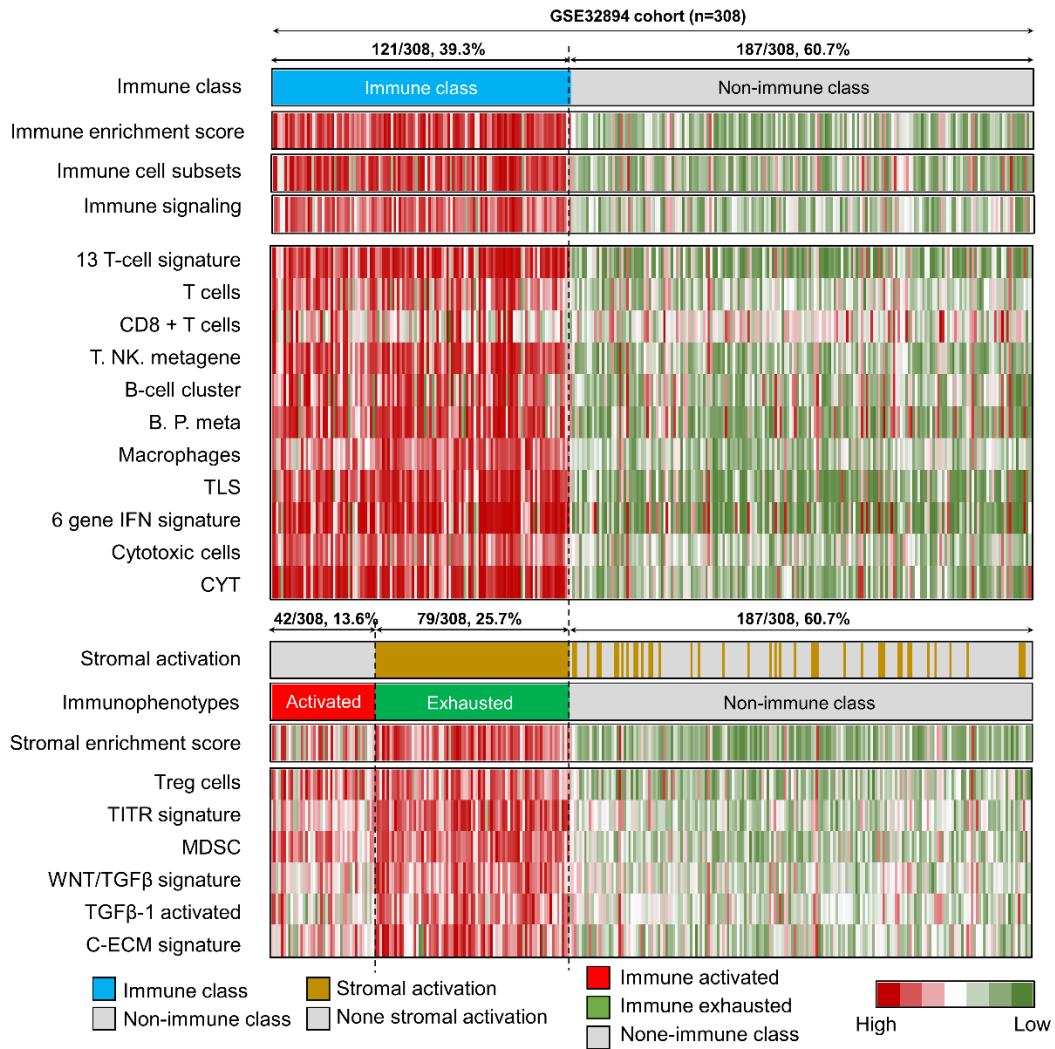

**Figure 6**

806

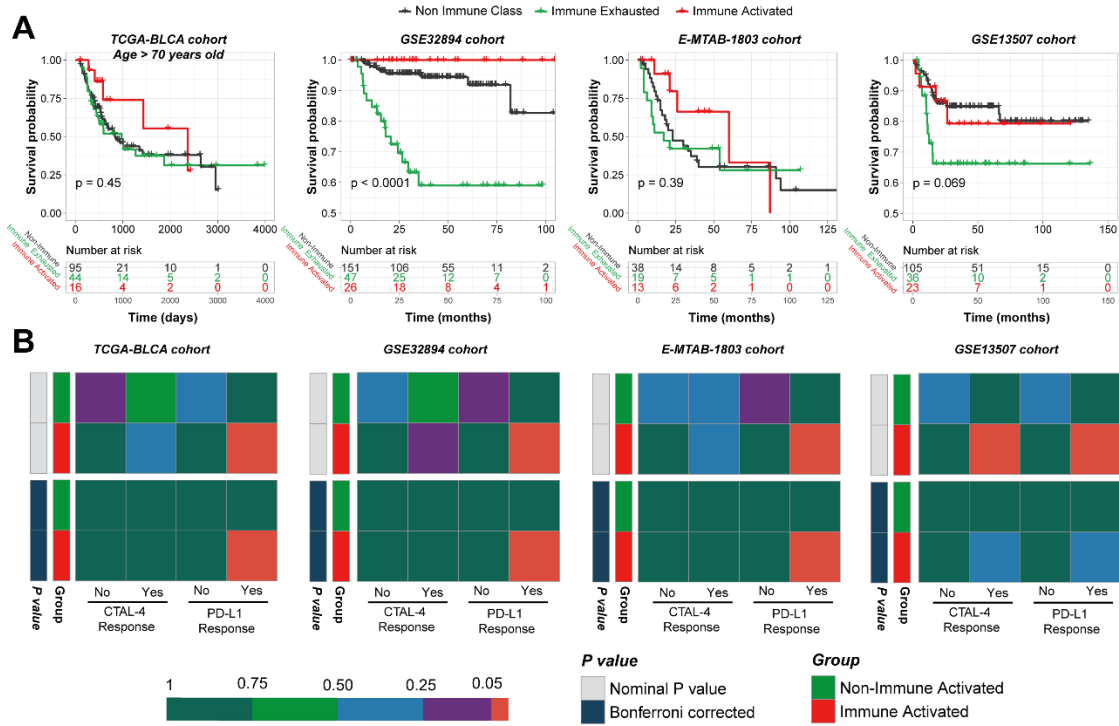

**Figure 7**

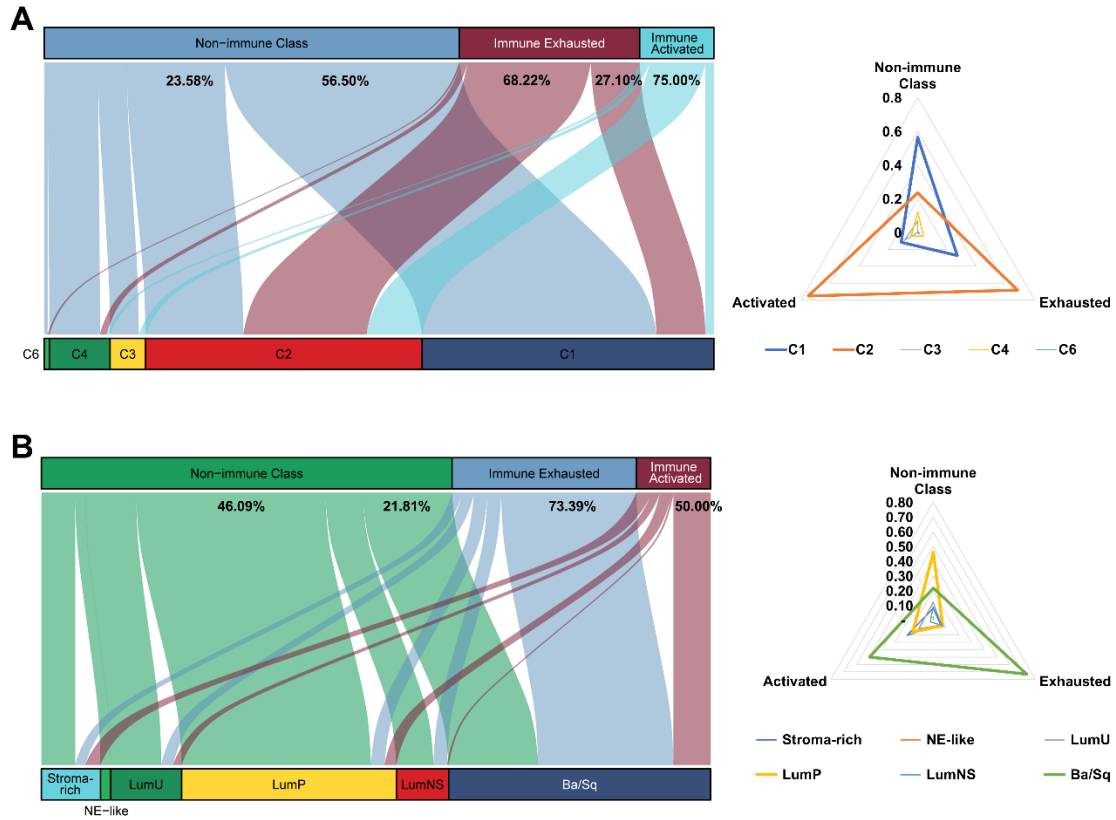

**Figure 8**

808
